# Supplementary material
Source: PubMed Central journal article supplement (PMC4546510)
Supplement: NIHMS689971-supplement-1.pdf [file NIHMS689971-supplement-1.pdf]

## Supplemental Information

# ***Simultaneously Targeting the NS3 Protease And Helicase Activities For More Effective Hepatitis C Virus Therapy***

Jean Ndjomou,<sup>1a</sup> M. Josie Corby,<sup>1</sup> Noreena L. Sweeney,<sup>1</sup> Alicia M. Hanson,<sup>1</sup> Cihan Aydin,<sup>2b</sup> Akbar Ali,<sup>2</sup> Celia A. Schiffer,<sup>2</sup> Kelin Li,<sup>3</sup> Kevin J. Frankowski,<sup>3</sup> Frank J. Schoenen,<sup>3</sup> and David N. Frick<sup>1</sup>

<sup>1</sup>*Department of Chemistry & Biochemistry, University of Wisconsin- Milwaukee, Milwaukee, Wisconsin 53211, United States*

<sup>2</sup>*Department of Biochemistry and Molecular Pharmacology, University of Massachusetts Medical School, Worcester, Massachusetts 01605, United States*

<sup>3</sup>*University of Kansas Specialized Chemistry Center, University of Kansas, 2034 Becker Drive, Lawrence, Kansas 66047, United States.*

**Figure S1: Alignment of the various HCV genotypes used in this study.** The sequence of each replicon used was aligned with the sequence of the recombinant scNS4A-NS3 construct previously used for crystallization (PDB file 1CU1). Replicon sequences were aligned using Clustal W, and the result was aligned with the 1CU1 sequence using UCSF Chimera. Numbers refer to positions in the NS3 protein. Conserved amino acids are colored by chemical class, and non-conserved residues are colored black. Amino acids unique to genotype 2a are highlighted in yellow in the 2a sequence, and they are highlighted as spheres in Figure 2D. Amino acids within 5Å of the putative HPI binding-site are highlighted in green on the 1CU1 sequence.

1b(con1) - - - - - I T A Y S Q Q T R G L L G C I I T S L T G R D R N Q V E G E V Q V V 36  
2a(JFH-1) - - - - - I T A Y A Q Q T R G L L G A I V V S M T G R D R T E Q A G E V Q I L 36  
3a\_S52 - - - - - I T A Y A Q Q T R G L L G T I V T S L T G R D K N I V T G E V Q V L 36  
4a\_ED43 - - - - - I T A Y A Q Q T R G L F S T I V T S L T G R D T N E N C G E V Q V L 36  
1CU1\_monomer\_noH.pdb G S V V I V G R I I L S G S G S I T A Y S Q Q T R G L L G C I I T S L T G R D K N Q V E G E V Q V V 36

1b(con1) S T A T Q S F L A T C V N G V C W T V Y H G A G S K T L A G P K G P I T Q M Y T N V D Q D L V G W Q 86  
2a(JFH-1) S T V S Q S F L G T T I S G V L W T V Y H G A G N K T L A G L R G P V T Q M Y S S A E G D L V G W P 86  
3a\_S52 S T A T Q T F L G T T V G G V M W T V Y H G A G S K T L A G A K H P A L Q M Y T N V D Q D L V G W P 86  
4a\_ED43 S T A T Q S F L G T A V N G V M W T V Y H G A G A K T I S G P K G P V N Q M Y T N V D Q D L V G W P 86  
1CU1\_monomer\_noH.pdb S T A S F L A T C V N G V C W T V Y H G A G S K T L A G P K G P I T Q M Y T N V D Q D L V G W Q 86

1b(con1) A P P G A R S L T P C T C G S S D L Y L V T R H A D V I P V R R R G D S R G S L L S P R P V S Y L K 136  
2a(JFH-1) S P P G T K S L E P C K C G A V D L Y L V T R N A D V I P A R R R G D K R G A L L S P R P I S T L K 136  
3a\_S52 A P P G A K S L E P C A C G S A D L Y L V T R D A D V I P A R R R G D S T A S L L S P R P L A C L K 136  
4a\_ED43 A P P G V R S L A P C T C G S A D L Y L V T R H A D V I P V R R R G D T R G A L L S P R P I S T L K 136  
1CU1\_monomer\_noH.pdb A P P G A R S L T P C T C G S S D L Y L V T R H A D V I P V R R R G D S R G S L L S P R P V S Y L K 136

1b(con1) G S S G G P L L C P S G H A V G I F R A A V C T R G V A K A V D F V P V E S M E T T M R S P V F T D 186  
2a(JFH-1) G S S G G P V L C P R G H V V G L F R A A V C S R G V A K S I D F I P V E T L D V V T R S P T F S D 186  
3a\_S52 G S S G G P V M C P S G H V A G I F R A A V C T R G V A K A L Q F V P V E T L S T Q A R S P S F S D 186  
4a\_ED43 G S S G G P L L C P M G H A A G I F R A A V C T R G V A K A V D F V P V E S L E T T M R S P V F T D 186  
1CU1\_monomer\_noH.pdb G S S G G P L L C P S G H A V G I F R A A V C T R G V A K A V D F V P V E S M E T T M R S P V F T D 186

1b(con1) N S S P P A V P Q T F Q V A H L H A P T G S G K S T K V P A A Y A A Q G Y K V L V L N P S V A A T L 236  
2a(JFH-1) N S T P P A V P Q T Y Q V G Y L H A P T G S G K S T K V P V A Y A A Q G Y K V L V L N P S V A A T L 236  
3a\_S52 N S T P P A V P Q S Y Q V G Y L H A P T G S G K S T K V P A A Y V A Q G Y N V L V L N P S V A A T L 236  
4a\_ED43 N S T P P A V P Q T Y Q V A H L H A P T G S G K S T K V P A A Y A A Q G Y K V L V L N P S V A A T L 236  
1CU1\_monomer\_noH.pdb N S S P P A V P Q S F Q V A H L H A P T G S G K S T K V P A A Y A A Q G Y K V L V L N P S V A A T L 236

1b(con1) G F G A Y M S K A H G I D P N I R T G V R T I T T G A P I T Y S T Y G K F L A D G G C S G G A Y D I 286  
2a(JFH-1) G F G A Y L S K A H G I N P N I R T G V R T V M T G E A I T Y S T Y G K F L A D G G C A S G A Y D I 286  
3a\_S52 G F G S F M S R A Y G I D P N I R T G N R T V T T G A K L T Y S T Y G K F L A D G G C S G G A Y D V 286  
4a\_ED43 G F G V Y M S K A Y G I D P N I R S G V R T I T T G A P I T Y S T Y G K F L A D G G C S G G A Y D I 286  
1CU1\_monomer\_noH.pdb G F G A Y M S K A H G I D P N I R T G V R T I T T G A P V T Y S T Y G K F L A D G G C S G G A Y D I 286

1b(con1) I I C D E C H S T D S T T I L G I G T V L D Q A E T A G A R L V V L A T A T P P G S V T V P H P N I 336  
2a(JFH-1) I I C D E C H A V I D A T S I L G I G T V L D Q A E T A G V R L T V L A T A T P P G S V T T P H P D I 336  
3a\_S52 I I C D E C H A Q D A T S I L G I G T V L D Q A E T A G V R L T V L A T A T P P G S I T V P H S N I 336  
4a\_ED43 I I C D E C H S T D S T T I L G I G T V L D Q A E T A G V R L T V L A T A T P P G S V T T P H S N I 336  
1CU1\_monomer\_noH.pdb I I C D E C H S T D S T T I L G I G T V L D Q A E T A G A R L V V L A T A T P P G S V T V P H P N I 336

1b(con1) E E V A L S S T G E I P F Y G K A I P I E T I K G G R H L I F C H S K K K C D E L A A K L S G L G L 386  
2a(JFH-1) E E V G L G R E G E I P F Y G R A I P L S C I K G G R H L I F C H S K K K C D E L A A A L R G M G L 386  
3a\_S52 E E V A L G S E G E I P F Y G K A I P I A L L K G G R H L I F C H S K K K C D E V A A K L R G M G L 386  
4a\_ED43 E E V A L P T T G E I P F Y G K A I P L E L I K G G R H L I F C H S K K K C D E L A R Q L T S L G L 386  
1CU1\_monomer\_noH.pdb E E V A L S N T G E I P F Y G K A I P I E A I R G G R H L I F C H S K K K C D E L A A K L S G L G I 386

1b(con1) N A V A Y Y R G L D V S V I P T S G D V I V V A T D A L M T G F T G D F D S V I D C N T C V T Q T V 436  
2a(JFH-1) N A V A Y Y R G L D V S I I P A Q G D V V V V A T D A L M T G Y T G D F D S V I D C N V A V T Q A V 436  
3a\_S52 N A V A Y Y R G L D V S V I P T T G D V V V C A T D A L M T G F T G D F D S V I D C N V A V E Q Y V 436  
4a\_ED43 N A V A Y Y R G L D V S V I P T S G D V V V C A T D A L M T G F T G D F D S V I D C N T S V I Q T V 436  
1CU1\_monomer\_noH.pdb N A V A Y Y R G L D V S V I P T I G D V V V V A T D A L M T G Y T G D F D S V I D C N T S V I Q T V 436

1b(con1) D F S L D P T F T I E T T T V P Q D A V S R S Q R R R G T G R G R M G I Y R F V T P G E R P S G M F 486  
2a(JFH-1) D F S L D P T F T I T T Q T V P Q D A V S R S Q R R R G T G R G R Q G T Y R Y V S T G E R A S G M F 486  
3a\_S52 D F S L D P T F S I E T R T A P Q D A V S R S Q R R R G T G R G R L G T Y R Y V A P G E R P S G M F 486  
4a\_ED43 D F S L D P T F S I E T T T V P Q D A V S R S Q R R R G T G R G R L G T Y R Y V T P G E R P S G M F 486  
1CU1\_monomer\_noH.pdb D F S L D P T F T I E T T T V P Q D A V S R S Q R R R G T G R G R R G I Y R F V T P G E R P S G M F 486

1b(con1) D S S V L C E C Y D A G C A W Y E L T P A E T S V R L R A Y L N T P G L P V C Q D H L E F W E S V F 536  
2a(JFH-1) D S V V L C E C Y D A G A A W Y D L T P A E T T V R L R A Y F N T P G L P V C Q D H L E F W E A V F 536  
3a\_S52 D S V V L C E C Y D A G C S W Y D L Q P A E T T V R L R A Y L N T P G L P V C Q D H L D F W E S V F 536  
4a\_ED43 D T A V L C E C Y D A G C A W Y E L T P A E T T T R L K A Y F D T P G L P V C Q D H L E F W E S V F 536  
1CU1\_monomer\_noH.pdb D S S V L C E C Y D A G C A W Y E L T P A E T S V R L R A Y L N T P G L P V C Q D H L E F W E S V F 536

1b(con1) T G L T H I D A H F L S Q T K Q A G D N F P Y L V A Y Q A T V C A R A Q A P P P S W D Q M W K C L I 586  
2a(JFH-1) T G L T H I D A H F L S Q T K Q A G E N F A Y L V A Y Q A T V C A R A K A P P P S W D A M W K C L A 586  
3a\_S52 T G L T H I D A H F L S Q T K Q Q G L N F S F L T A Y Q A T V C A R A Q A S P P S W D E T W K C L V 586  
4a\_ED43 T G L T H I D G H F L S Q T K Q S G E N F P Y L V A Y Q A T V C A K A L A P P P S W D T M W K C L I 586  
1CU1\_monomer\_noH.pdb T G L T H I D A H F L S Q T K Q A G D N F P Y L V A Y Q A T V C A R A Q A P P P S W D Q M W K C L I 586

1b(con1) R L K P T L H G P T P L L Y R L G A V Q N E V T T T H P I T K Y I M A C M S A D L E V V T 631  
2a(JFH-1) R L K P T L A G P T P L L Y R L G P I T N E V T L T H P G T K Y I A T C M Q A D L E V M T 631  
3a\_S52 R L K P T L H G P T P L L Y R L G P V Q N D I C L T H P V T K Y I M A C M S A D L E V T T 631  
4a\_ED43 R L K P T L H G P T P L L Y R L G S V Q N E V V L T H P I T K Y I M A C M S A D L E V V T 631  
1CU1\_monomer\_noH.pdb R L K P T L H G P T P L L Y R L G A V Q N E V T L T H P I T K Y I M A C M S A D L E V V T 631
